# Supplementary material
Source: publisher figshare collection journal article supplement (https://gsajournals.figshare.com/articles/dataset/_/12290333)

# 20m vs Untreated

Total Expression GM12878

4

3

2

1

Average occupancy  
per cluster (AU)

0.4  
0.2  
0.0  
-0.4

-1000 0 1000

TSS

Increase in  
Untreated

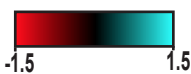

Increase in  
timepoint

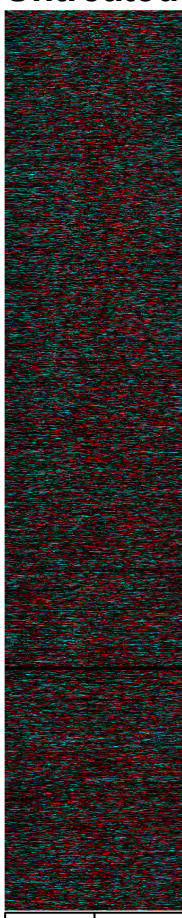

Supplement: Supplementary file 2 [file 2]
