# Supplementary material
Source: publisher figshare collection journal article supplement (https://gsajournals.figshare.com/articles/dataset/_/12290333)

**A**

# MNase Sensitivity Independent Sorts

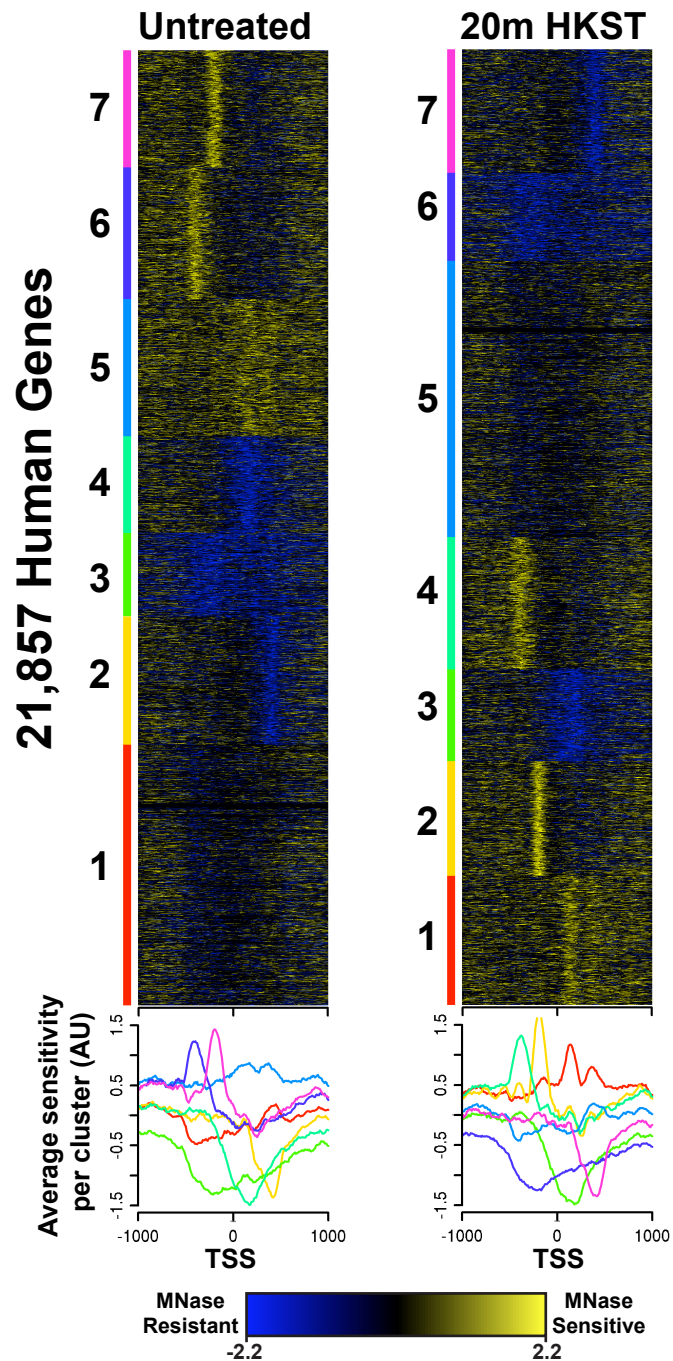**B**

# -1 Sensitive Nucleosomes

Unique to 20 min HKST

Unique to untreated

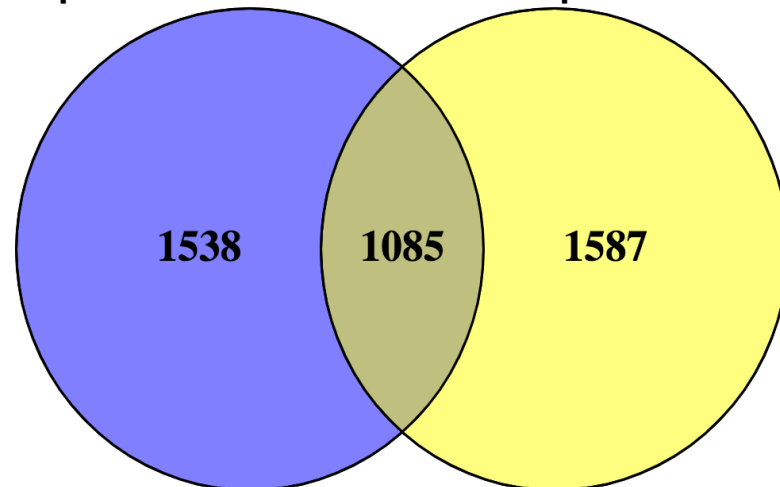

Supplement: Supplementary file 5 [file 2]
