# Supplementary material
Source: publisher figshare collection journal article supplement (https://gsajournals.figshare.com/articles/dataset/_/12290333)

# GM12878 Total Nucleosome Occupancy

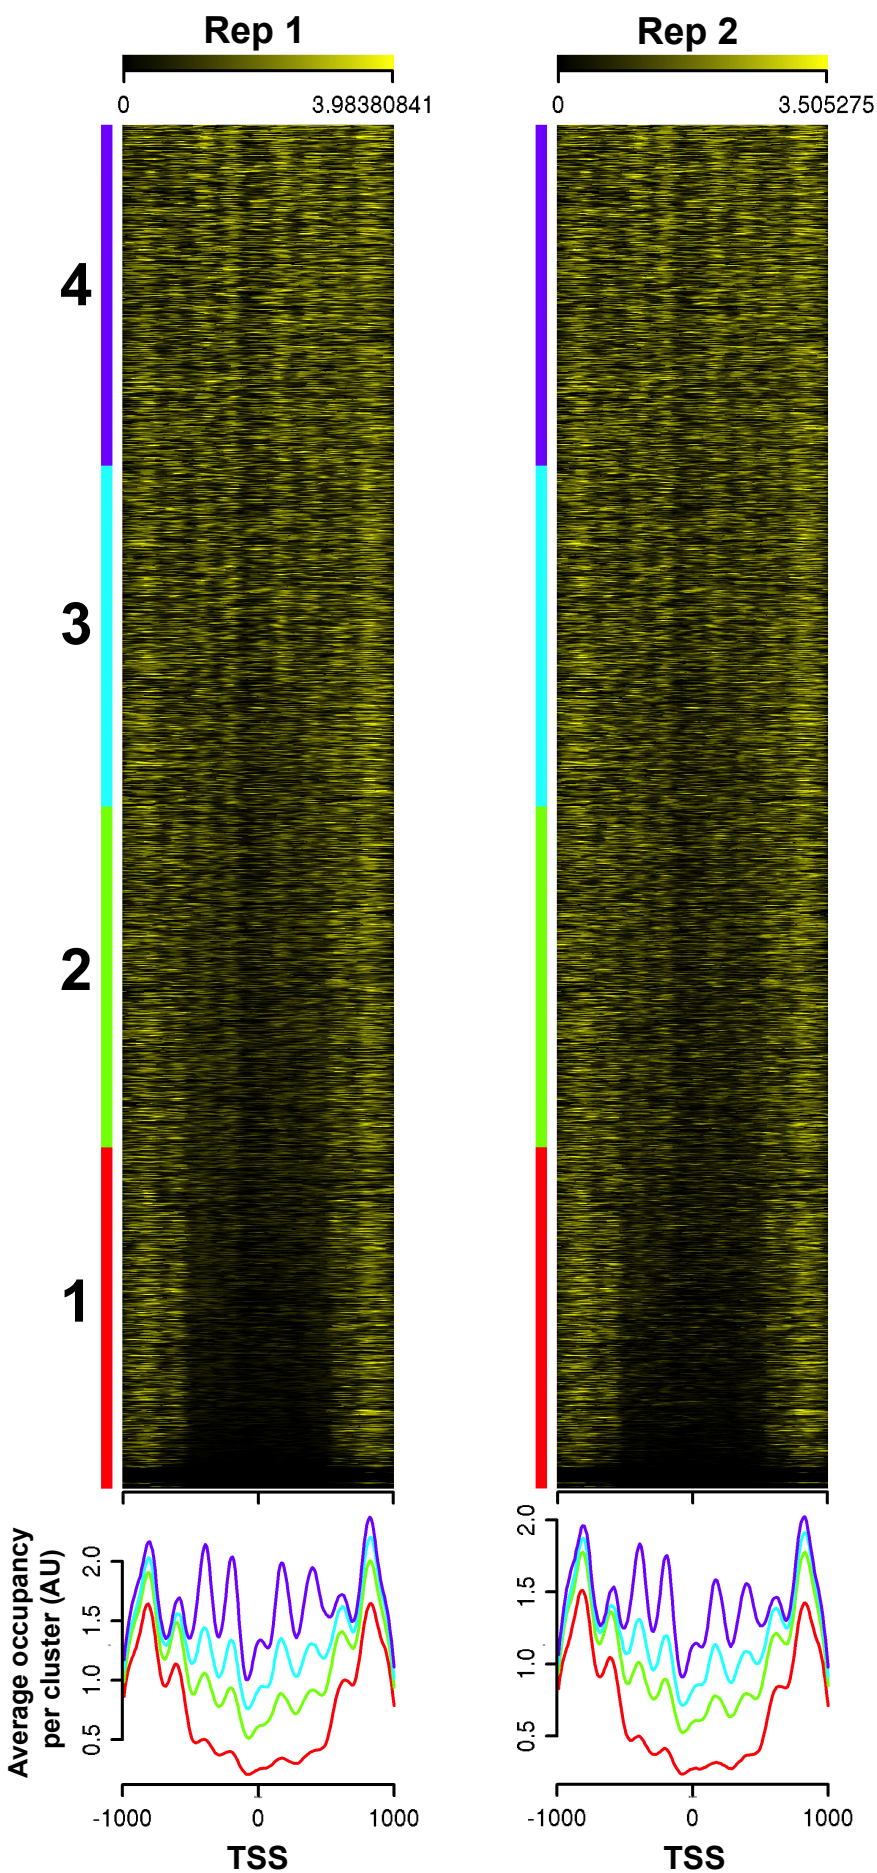

Supplement: Supplementary file 1 [file 2]

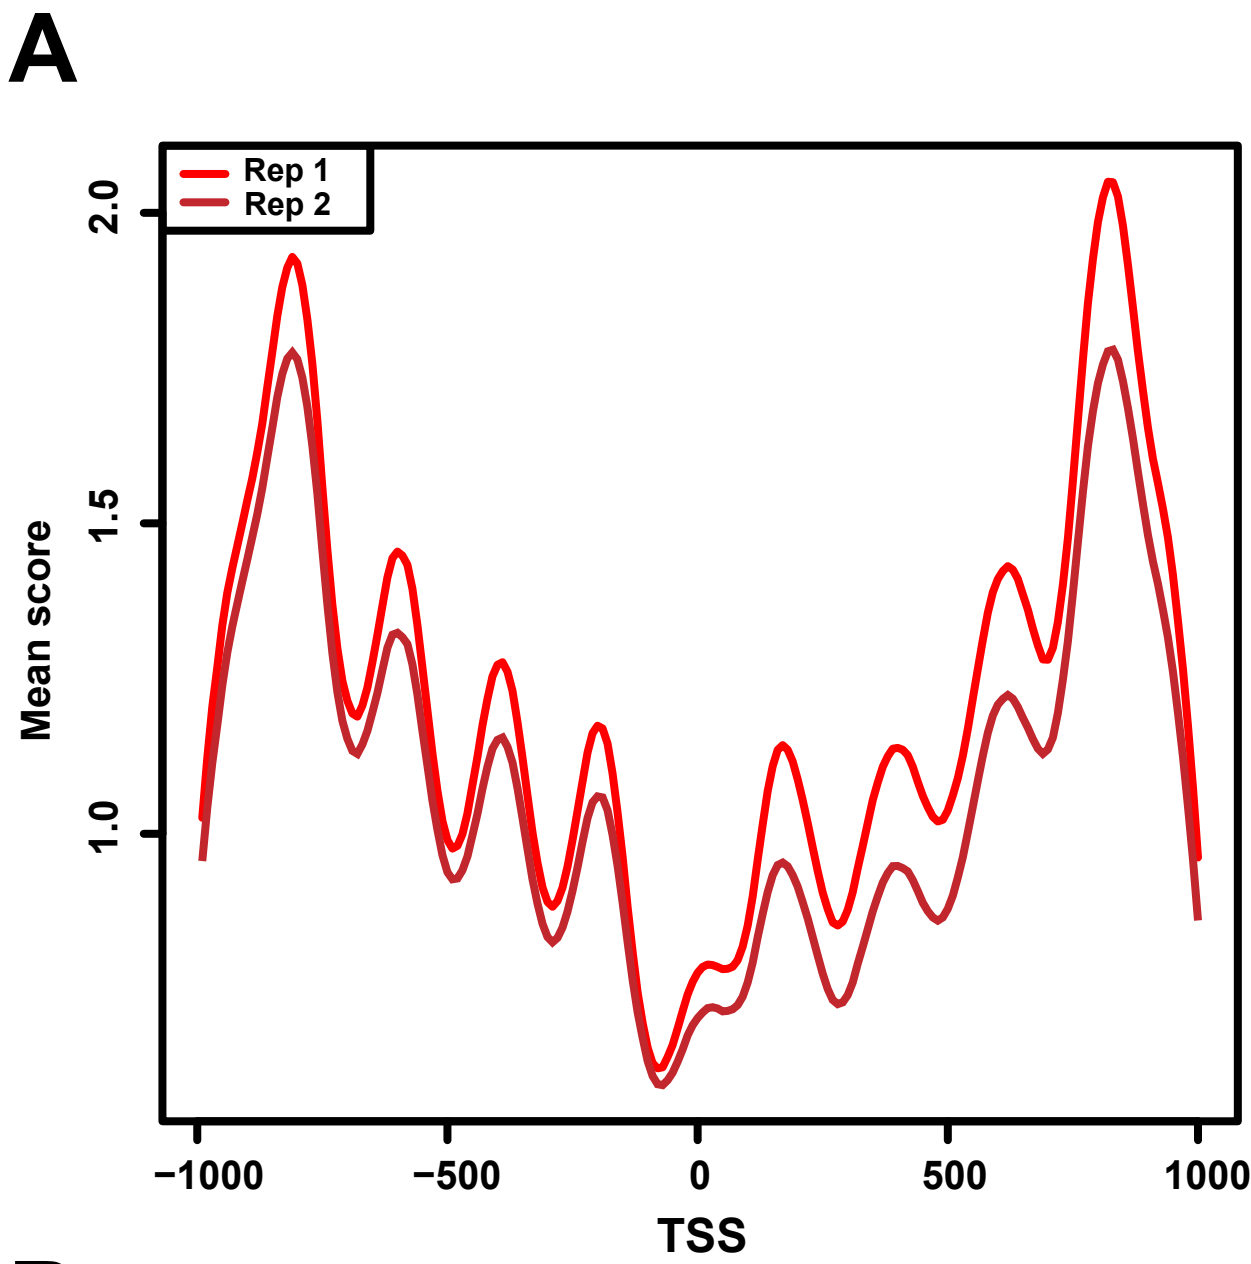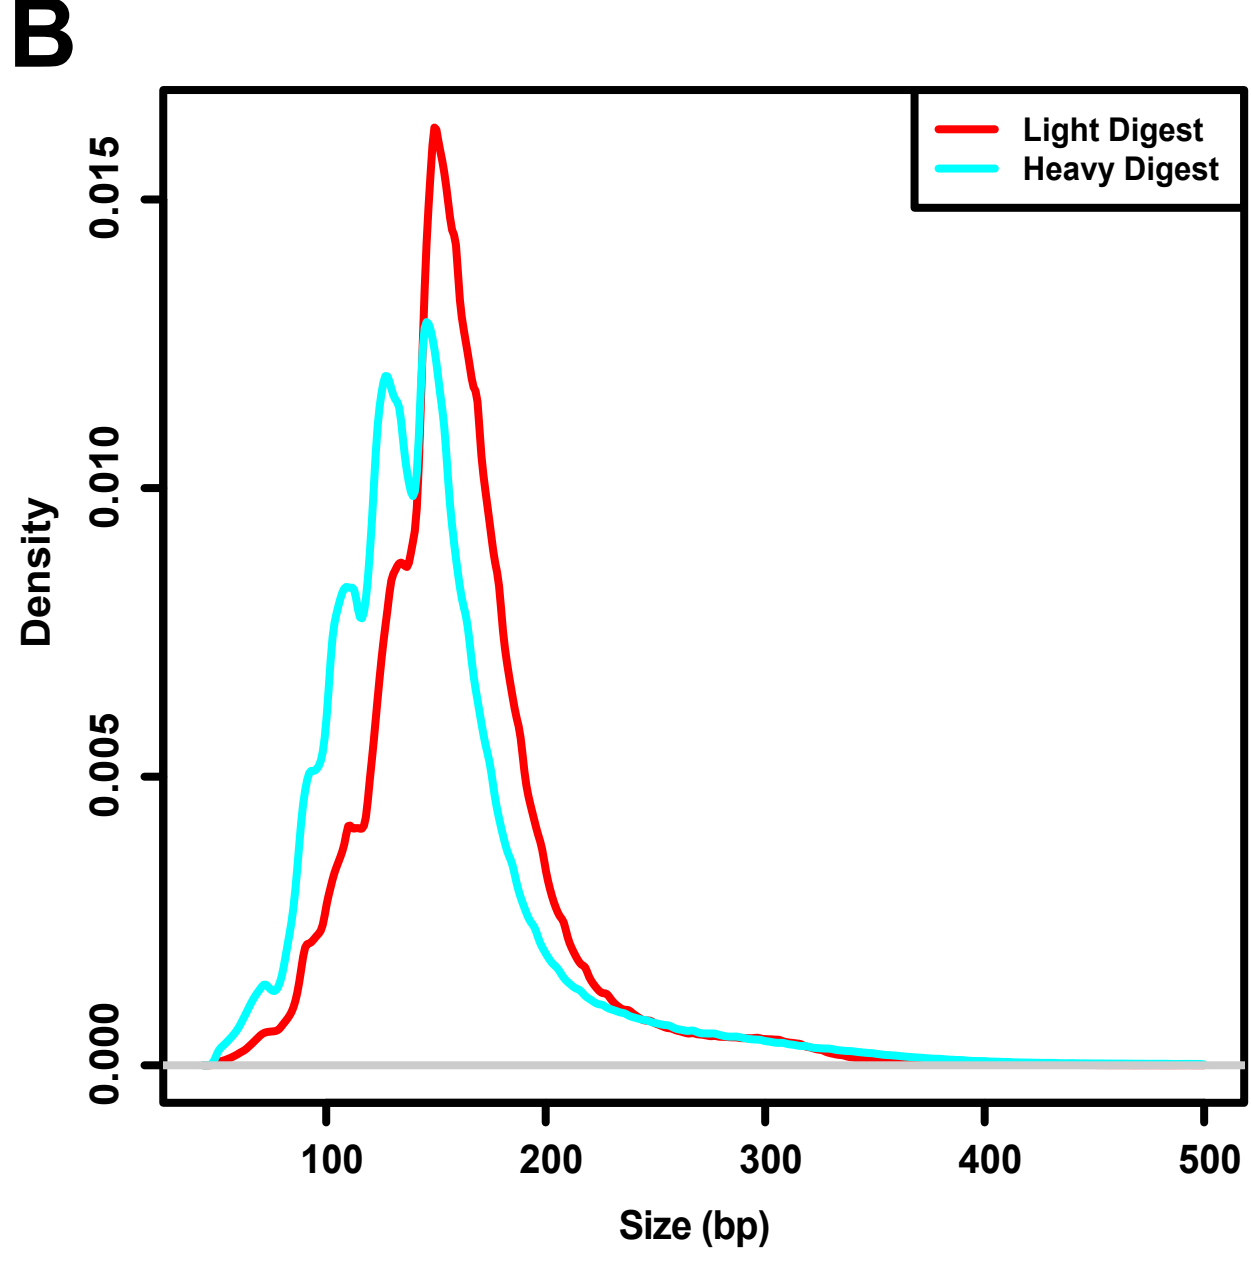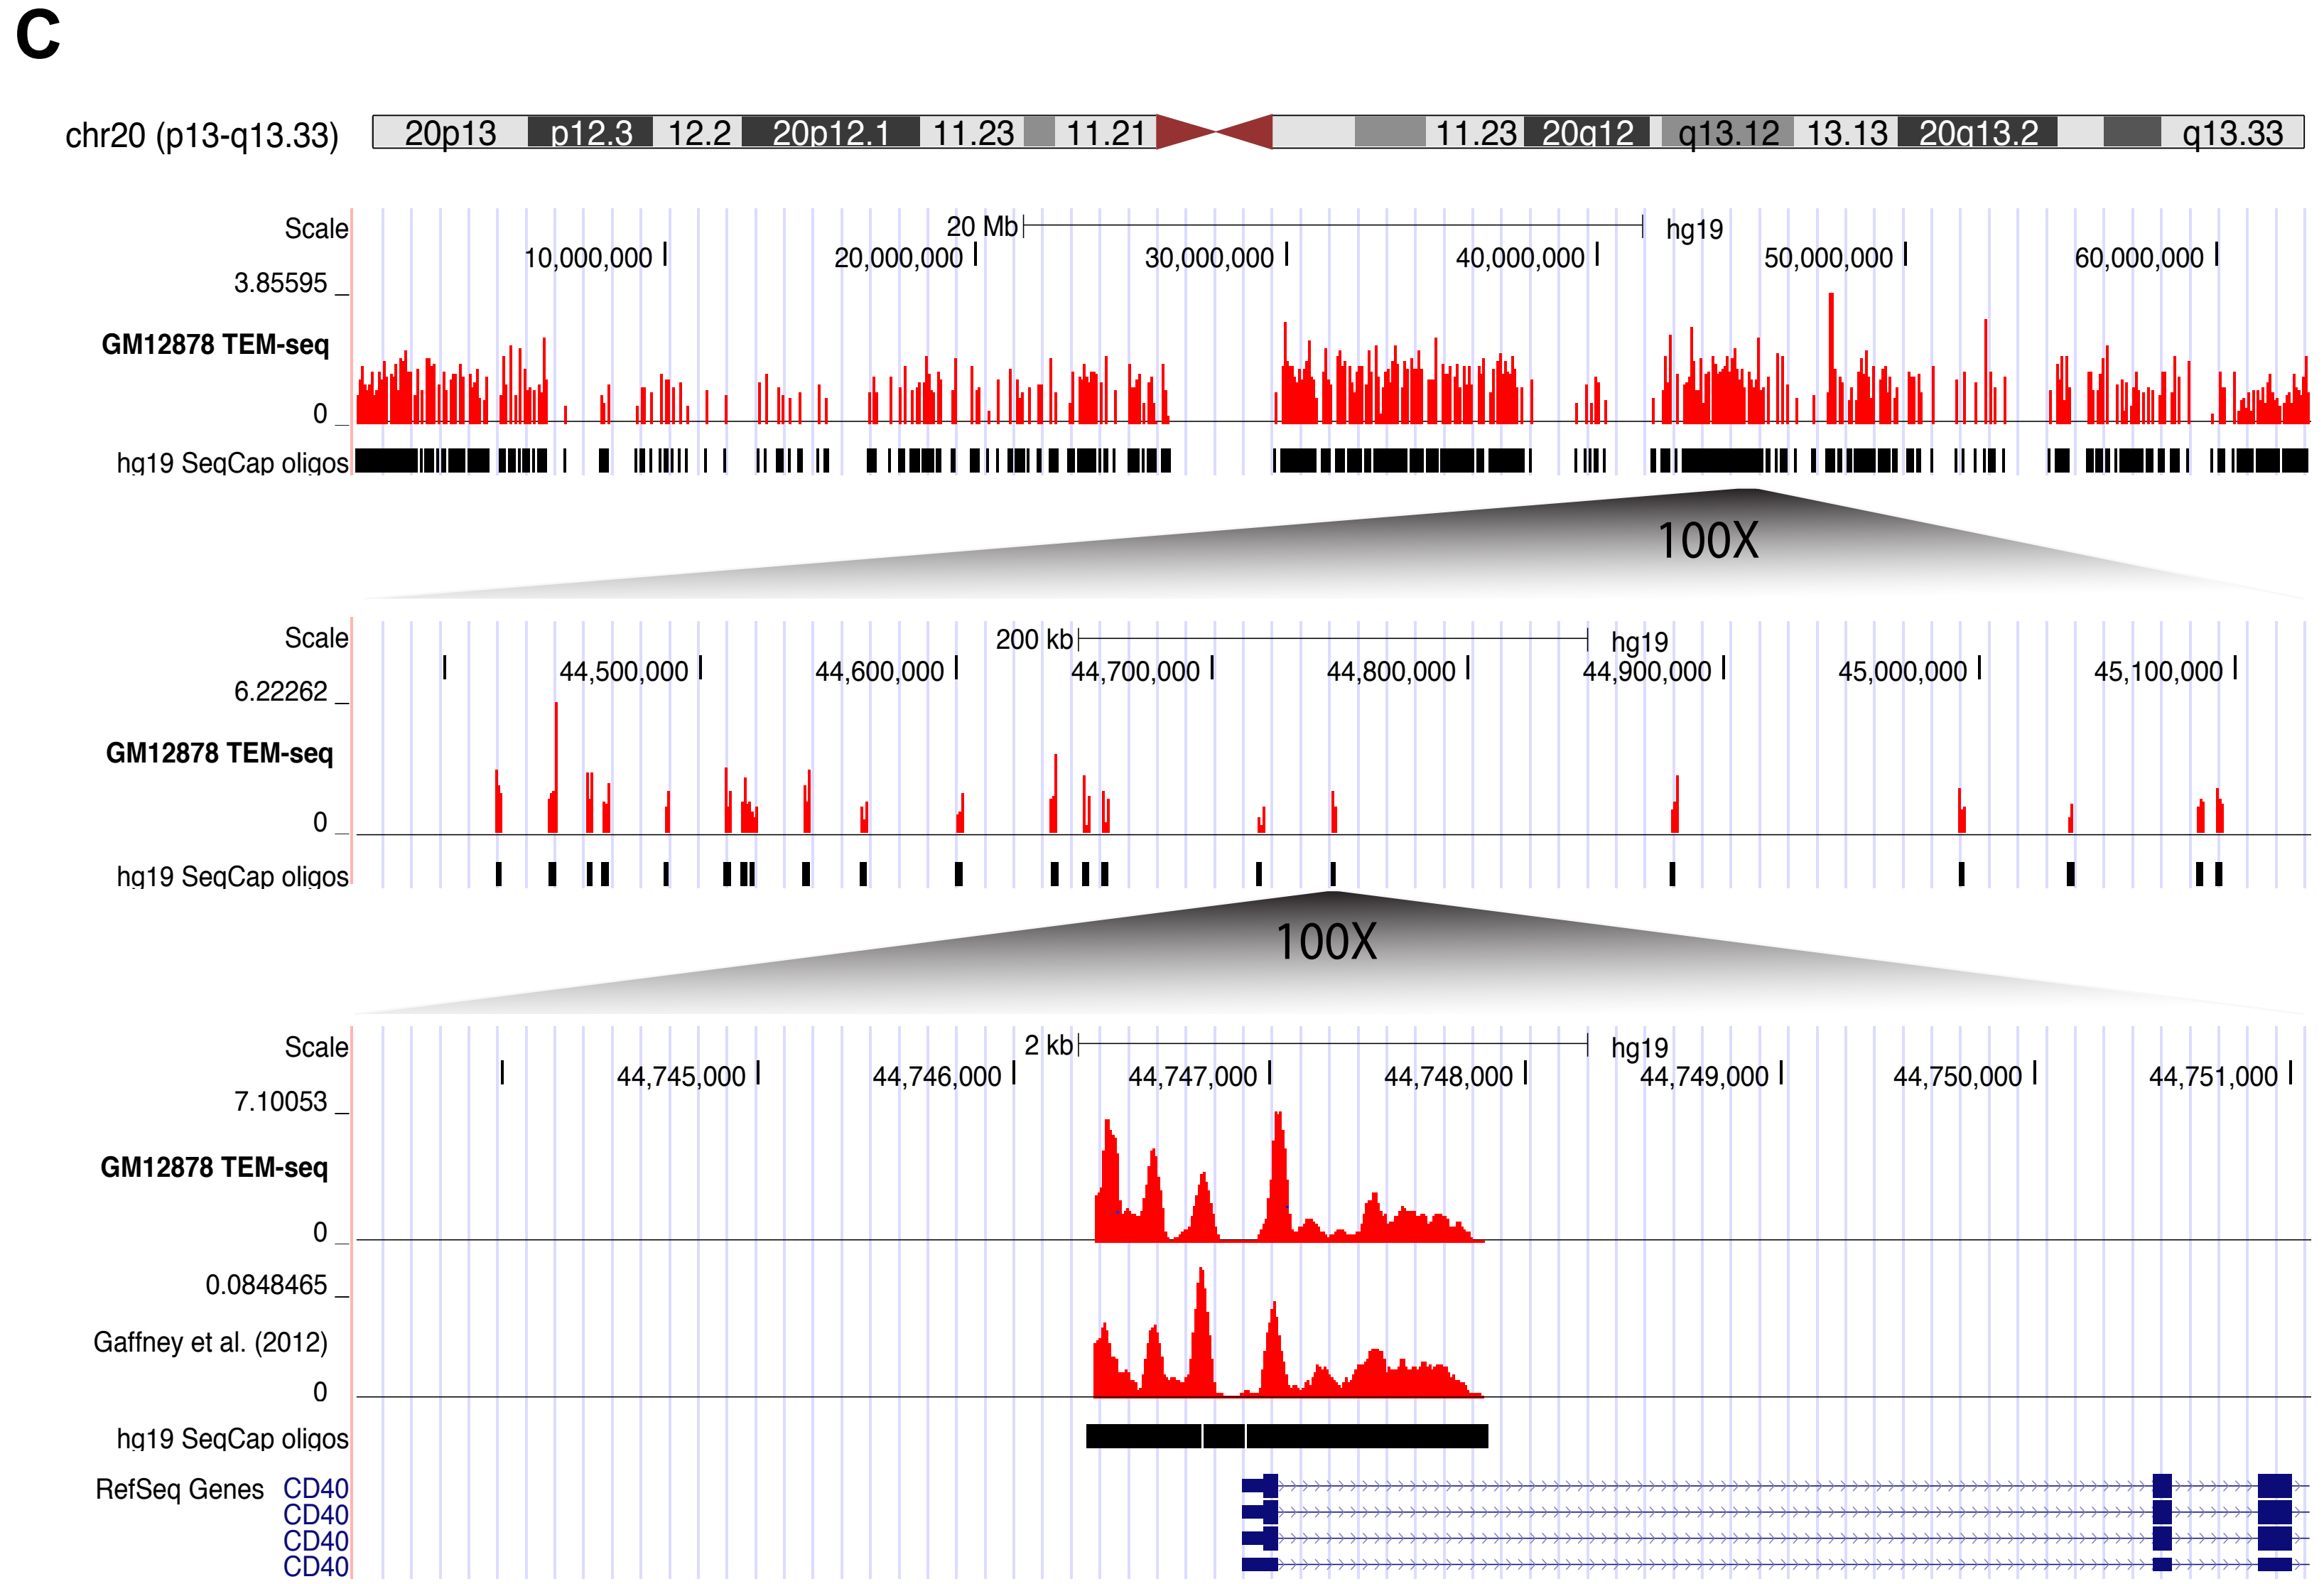

Supplement: Supplementary file 3 [file 2]

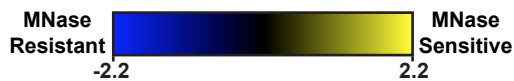

## Independently Sorted MNase-Sensitivity

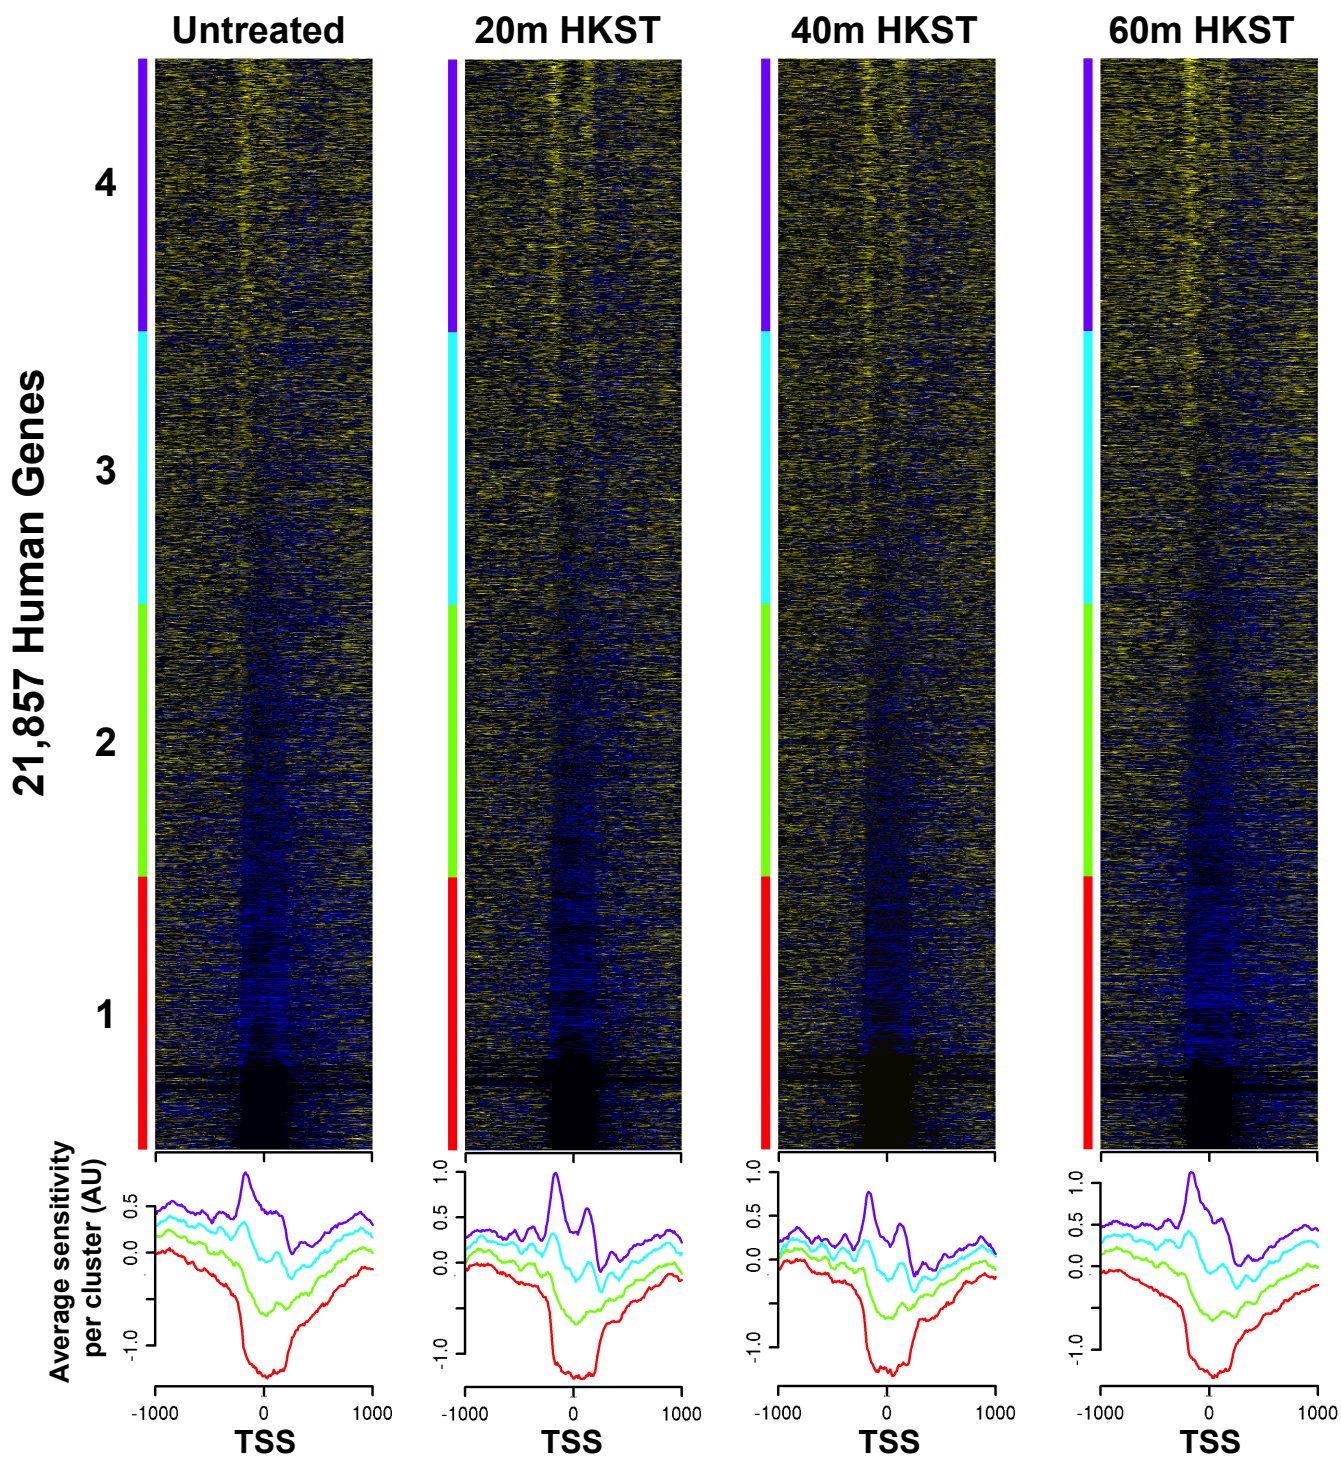

Supplement: Supplementary file 4 [file 2]
